# Supplementary figures and images for: Condensin positioning at telomeres by shelterin proteins drives sister-telomere disjunction in anaphase
Source: eLife journal article supplement (doi:10.7554/elife.89812), 2023-07-12

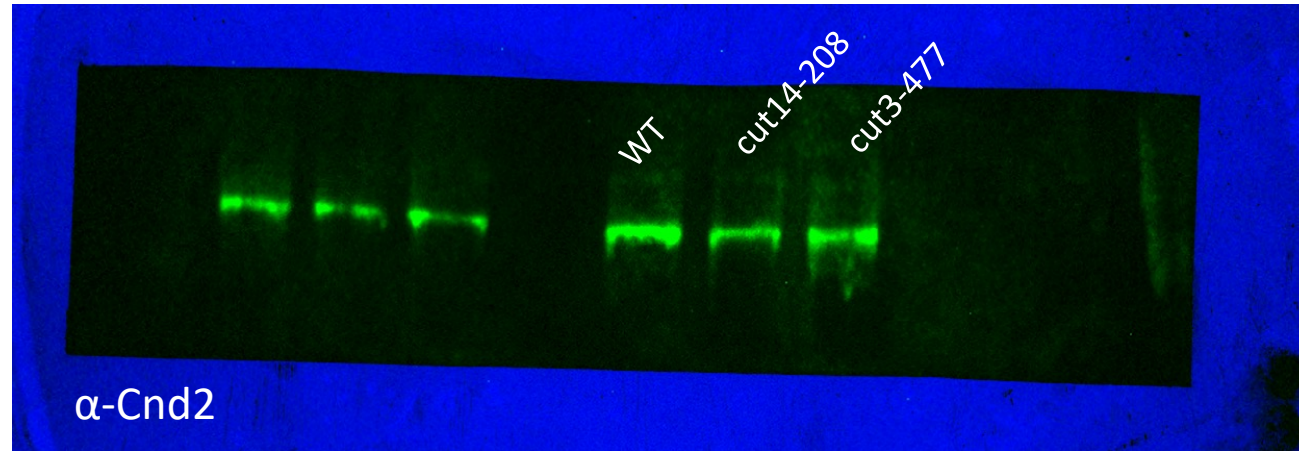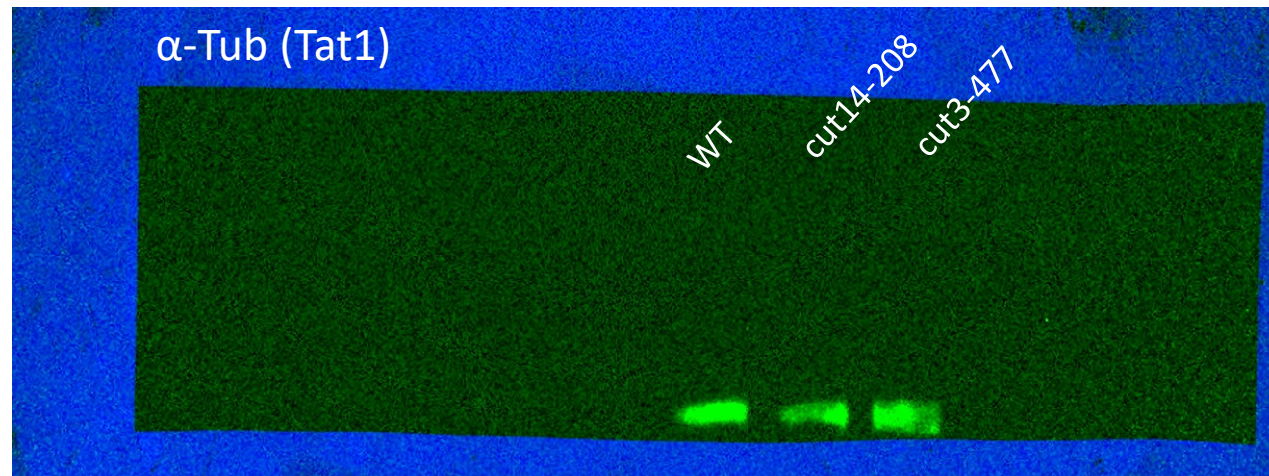

Supplement: fig1-data1 [file elife-89812-fig1-data1-v1.zip]

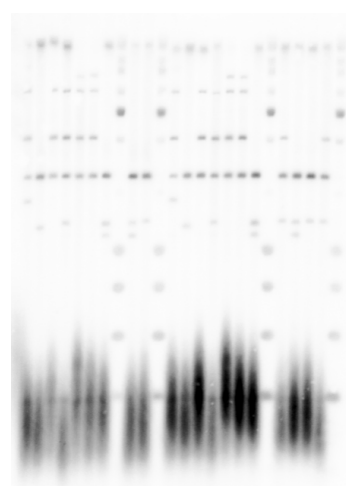

Supplement: fig2-data1 [file elife-89812-fig2-data1-v1.zip]
